# Supplementary material for: PROMPT: a protein mapping and comparison tool
Source: Springer Nature journal article supplement (doi:10.1186/1471-2105-7-331), 2006-07-04
Supplement: Additional file 1 [file 1471-2105-7-331-s1.pdf]

```
<?xml version="1.0" encoding="UTF-8"?>
<!--DTD for the generic XML format-->
<!ELEMENT dataset (property+)>
<!ELEMENT property (input+)>
<!ELEMENT input EMPTY>
<!ATTLIST dataset
    label CDATA #REQUIRED
    version CDATA #IMPLIED
>
<!ATTLIST property
    id CDATA #REQUIRED
    type (symbolic | numeric) #REQUIRED
>
<!ATTLIST input
    id CDATA #IMPLIED
    value CDATA #REQUIRED
>
```
